# Supplementary material for: Treatment-Interval Changes in Serum Levels of Albumin and Histidine Correlated with Treatment Interruption in Patients with Locally Advanced Head and Neck Squamous Cell Carcinoma Completing Chemoradiotherapy under Recommended Calorie and Protein Provision
Source: MDPI journal article supplement (doi:10.3390/cancers14133112), 2022-06-24
Supplement: s1 [file s1]

## Supplementary Information

Table S1. Clinicopathologic variables, biochemical and nutrition-inflammation data, anthropometric and body composition characteristics, serum HLOP metabolite and treatment-related factors of 44 patients with LAHNSCC completing CCRT course stratified by the status of CRP change during the treatment course

| Variables expressed as Numbers (%) or mean $\pm$ SD | ALL                              | $\Delta$ CRP increase <sup>s</sup> | $\Delta$ CRP decrease <sup>s</sup> | <i>p</i> value* |
|-----------------------------------------------------|----------------------------------|------------------------------------|------------------------------------|-----------------|
| Included patient number                             | 44 (100.0)                       | 29 (65.9)                          | 15 (34.1)                          |                 |
| Treatment interruption (no : yes)                   | 35 (79.5) : 9 (20.5)             | 20 (69.0) : 9 (31.0)               | 15 (100.0) : 0 (0.0)               | 0.016*          |
| <b>Clinicopathologic</b>                            |                                  |                                    |                                    |                 |
| Age (years)                                         | 54.7 $\pm$ 9.2                   | 56.1 $\pm$ 8.8                     | 53.0 $\pm$ 9.6                     | 0.189           |
| $\geq 65$ : <65                                     | 6 (13.6) : 38 (86.4)             | 5 (17.2) : 24 (82.8)               | 1 (6.7) : 14 (93.3)                | 0.333           |
| Sex (male: female)                                  | 42 (95.5) : 2 (4.5)              | 28 (96.6) : 1 (3.4)                | 14 (93.3) : 1 (6.7)                | 0.627           |
| Tumor location (oral cavity/non-oral cavity)        |                                  |                                    |                                    | 0.754           |
| Buccal mucosa/Tonsil                                | 3 (6.8) / 3 (6.8)                | 2 (6.9) / 2 (6.9)                  | 1 (6.7) / 1 (6.7)                  |                 |
| Tongue/Tongue base                                  | 12 (27.2) / 1 (2.2)              | 9 (31.0) / 0 (0.0)                 | 3 (20.1) / 1 (6.7)                 |                 |
| Gingiva/Soft palate                                 | 5 (11.4) / 0 (0.0)               | 3 (10.3) / 0 (0.0)                 | 2 (13.3) / 0 (0.0)                 |                 |
| Retromolar /Hypopharynx                             | 2 (4.5) / 10 (22.7)              | 2 (6.9) / 7 (24.1)                 | 0 (0.0) / 3 (20.0)                 |                 |
| Hard palate / Larynx                                | 1 (2.2) / 5 (6.7)                | 0 (0.0) / 3 (10.3)                 | 1 (6.7) 2 (13.3)                   |                 |
| Lip/--                                              | 2 (4.5) / --                     | 1 (3.4) / --                       | 1 (6.7) / ---                      |                 |
| TNM stage                                           |                                  |                                    |                                    | 0.191           |
| III : IVA : IVB                                     | 5 (11.4) : 25 (56.8) : 14 (31.8) | 5 (17.2):16 (55.2) : 8 (27.6)      | 0 (0.0) : 8 (53.3) : 7 (46.7)      |                 |
| T status                                            |                                  |                                    |                                    | 0.359           |
| T0-2 : T3-4                                         | 11 (25.0) : 33 (75.0)            | 6 (20.7) : 23 (79.3)               | 5 (33.3) : 10 (66.7)               |                 |
| N status                                            |                                  |                                    |                                    | 0.939           |
| N0-1 : N2-3                                         | 15 (34.1) : 29 (65.9)            | 10 (34.5) : 19 (65.5)              | 5 (33.3) : 10 (66.7)               |                 |
| <b>Histological differentiation grade</b>           |                                  |                                    |                                    |                 |
| well : moderately : poorly                          | 6 (13.6): 32 (72.8) : 6 (13.6)   | 5 (17.2): 19 (65.6) : 5 (17.2)     | 1 (6.7): 13 (86.7) : 1 (6.7)       | 0.328           |
| ECOG performance status (0 : 1 : 2)                 | 3 (6.9) : 39 (88.6) : 2 (4.5)    | 2 (6.9) : 25 (86.2) : 2 (6.9)      | 1 (6.7) : 14 (93.3) : 0 (0.0)      | 0.579           |
| Tracheostomy (no vs. yes)                           | 27 (61.4) : 17 (38.6)            | 17 (58.6) : 12 (41.4)              | 10 (66.6) : 5 (33.4)               | 0.603           |
| Smoking exposure (no vs. yes)                       | 7 (15.9) : 37 (84.1)             | 5 (17.2) : 24 (82.8)               | 2 (13.3) : 13 (86.7)               | 0.737           |
| Alcohol consumption (no vs. yes)                    | 12 (27.3) : 32 (72.7)            | 8 (27.6) : 21 (72.4)               | 4 (26.7) : 11 (73.3)               | 0.948           |
| Betel nut use (no vs. yes)                          | 16 (36.4) : 28 (63.6)            | 11 (37.9) : 18 (62.1)              | 5 (33.4) : 10 (66.6)               | 0.764           |
| HN-CCI (0 : $\geq 1$ )                              | 0 (0.0) : 44 (100.0)             | 0 (0.0) : 29 (100.0)               | 0 (0.0) : 15 (100.0)               | ----            |
| <b>PG-SGA assessment before CCRT</b>                |                                  |                                    |                                    |                 |
| Malnutrition none: moderate : severe                | 9 (20.5): 26 (59.0) : 9 (20.5)   | 6 (20.7): 17 (58.6) : 6 (20.7)     | 3 (20.0): 9 (60.0) : 3 (20.0)      | 0.996           |
| <b>Biochemical data</b>                             |                                  |                                    |                                    |                 |
| <b>Before CCRT</b>                                  |                                  |                                    |                                    |                 |
| eGFR (mL/min/1.73 m <sup>2</sup> )                  | 105.4 $\pm$ 28.8                 | 104.8 $\pm$ 31.2                   | 106.3 $\pm$ 24.5                   | 0.878           |
| ALT (U/L, normal $\leq$ 36)                         | 22.5 $\pm$ 10.8                  | 25.6 $\pm$ 16.9                    | 22.4 $\pm$ 9.4                     | 0.516           |
| Total bilirubin (mg/dL, normal $\leq$ 1.3)          | 0.8 $\pm$ 0.4                    | 0.5 $\pm$ 0.4                      | 0.4 $\pm$ 0.1                      | 0.434           |
| Uric acid (mg/dL, normal < 7.0)                     | 5.2 $\pm$ 1.7                    | 5.2 $\pm$ 1.7                      | 5.1 $\pm$ 2.1                      | 0.885           |
| Sugar (AC, mg/dL)                                   | 115.2 $\pm$ 16.5                 | 111.1 $\pm$ 546.6                  | 123.1 $\pm$ 51.8                   | 0.445           |
| <b>Treatment-interval change (%)</b>                |                                  |                                    |                                    |                 |
| $\Delta$ eGFR%*                                     | -11.3 $\pm$ 26.7                 | -6.6 $\pm$ 29.5                    | -20.4 $\pm$ 24.8                   | 0.128           |
| $\Delta$ ALT%*                                      | -22.5 $\pm$ 28.5                 | -18.0 $\pm$ 18.8                   | -31.4 $\pm$ 44.6                   | 0.747           |
| $\Delta$ Total bilirubin%*                          | -2.2 $\pm$ 8.5                   | -1.0 $\pm$ 11.6                    | -8.6 $\pm$ 10.9                    | 0.597           |

|                                                     |                       |                      |                      |        |
|-----------------------------------------------------|-----------------------|----------------------|----------------------|--------|
| $\Delta$ Uric acid%*                                | -3.5 $\pm$ 46.7       | -11.2 $\pm$ 7.4      | 12.5 $\pm$ 6.9       | 0.038* |
| $\Delta$ Sugar (AC)*                                | -9.1 $\pm$ 36.7       | -7.4 $\pm$ 46.8      | -12.1 $\pm$ 26.5     | 0.697  |
| <b>Anthropometric data and blood</b>                |                       |                      |                      |        |
| <b>NIB data</b>                                     |                       |                      |                      |        |
| Before CCRT                                         |                       |                      |                      |        |
| BW (kg)                                             | 63.9 $\pm$ 12.4       | 63.7 $\pm$ 11.4      | 64.3 $\pm$ 14.4      | 0.899  |
| BMI (kg/m <sup>2</sup> )                            | 23.1 $\pm$ 3.9        | 23.2 $\pm$ 3.7       | 22.8 $\pm$ 4.2       | 0.782  |
| < 18.5 : $\geq$ 18.5                                | 10 (22.7) : 34 (77.3) | 7 (24.1) : 22 (75.9) | 3 (20.0) : 12 (80.0) | 0.594  |
| Hb (g/dL)                                           | 12.0 $\pm$ 1.8        | 11.9 $\pm$ 1.4       | 12.0 $\pm$ 2.4       | 0.963  |
| WBC (x10 <sup>3</sup> cells/mm <sup>3</sup> )       | 6.6 $\pm$ 2.8         | 6.6 $\pm$ 3.2        | 6.5 $\pm$ 1.7        | 0.920  |
| Platelet count (x10 <sup>3</sup> /mm <sup>3</sup> ) | 260.1 $\pm$ 91.4      | 244.3 $\pm$ 82.2     | 290.6 $\pm$ 103.1    | 0.111  |
| TLC (x10 <sup>3</sup> cells/mm <sup>3</sup> )       | 1.8 $\pm$ 0.6         | 1.8 $\pm$ 0.6        | 1.7 $\pm$ 0.7        | 0.761  |
| < 1.5 : $\geq$ 1.5                                  | 14 (31.8) : 30 (68.2) | 8 (27.6) : 21 (72.4) | 6 (40.0) : 9 (60.0)  | 0.402  |
| TNC (x 10 <sup>3</sup> /mm <sup>3</sup> )           | 4.0 $\pm$ 0.3         | 4.0 $\pm$ 0.4        | 4.0 $\pm$ 1.2        | 0.941  |
| TMC (x 10 <sup>3</sup> /mm <sup>3</sup> )           | 0.5 $\pm$ 0.3         | 0.5 $\pm$ 0.3        | 0.4 $\pm$ 0.1        | 0.389  |
| Albumin (g/dL)                                      | 3.9 $\pm$ 0.4         | 3.9 $\pm$ 0.4        | 3.9 $\pm$ 0.3        | 0.827  |
| < 3.5 : $\geq$ 3.5                                  | 5 (11.4) : 39 (88.6)  | 3 (10.3) : 26 (89.7) | 2 (13.3) : 13 (86.7) | 0.767  |
| Prealbumin (g/dL, normal: 20–40)                    | 25.3 $\pm$ 5.4        | 25.3 $\pm$ 5.7       | 25.4 $\pm$ 5.1       | 0.941  |
| Transferrin (g/dL normal: 200–360)                  | 208.0 $\pm$ 34.6      | 208.9 $\pm$ 36.3     | 206.2 $\pm$ 32.1     | 0.807  |
| Total cholesterol (mg/dL, normal < 200)             | 169.3 $\pm$ 41.8      | 167.8 $\pm$ 96.5     | 172.4 $\pm$ 42.0     | 0.760  |
| Triglyceride (mg/dL, normal < 150)                  | 160.5 $\pm$ 15.4      | 152.5 $\pm$ 17.2     | 175.8 $\pm$ 116.3    | 0.483  |
| CRP (mg/dL)                                         | 6.3 $\pm$ 7.7         | 3.5 $\pm$ 4.0        | 11.7 $\pm$ 10.2      | 0.009* |
| Treatment-interval change (%)                       |                       |                      |                      |        |
| $\Delta$ BW%*                                       | -4.9 $\pm$ 5.7        | -6.2 $\pm$ 5.9       | -2.6 $\pm$ 4.6       | 0.041* |
| $\Delta$ BMI%*                                      | -4.9 $\pm$ 6.4        | -6.5 $\pm$ 6.4       | -1.8 $\pm$ 5.2       | 0.018* |
| $\Delta$ Hb%*                                       | -13.3 $\pm$ 14.1      | -13.5 $\pm$ 2.5      | -12.6 $\pm$ 3.9      | 0.836  |
| $\Delta$ WBC%*                                      | -25.9 $\pm$ 51.6      | -20.8 $\pm$ 10.8     | -36.0 $\pm$ 18.6     | 0.359  |
| $\Delta$ Platelet%*                                 | -15.5 $\pm$ 37.8      | -13.6 $\pm$ 40.4     | -19.1 $\pm$ 32.9     | 0.654  |
| $\Delta$ TLC%*                                      | -24.8 $\pm$ 8.5       | -34.7 $\pm$ 32.6     | -17.5 $\pm$ 21.4     | 0.211  |
| $\Delta$ TNC%*                                      | 16.4 $\pm$ 3.0        | 18.1 $\pm$ 3.6       | 11.7 $\pm$ 5.6       | 0.249  |
| $\Delta$ TMC%*                                      | -4.0 $\pm$ 10.9       | -5.9 $\pm$ 11.7      | -1.3 $\pm$ 23.3      | 0.813  |
| $\Delta$ Albumin%*                                  | -1.0 $\pm$ 14.1       | -2.6 $\pm$ 15.2      | 6.8 $\pm$ 6.4        | 0.031* |
| $\Delta$ Prealbumin%*                               | -9.7 $\pm$ 28.2       | -9.7 $\pm$ 23.8      | 10.8 $\pm$ 31.7      | 0.020* |
| $\Delta$ Transferrin%*                              | -13.1 $\pm$ 13.3      | -6.2 $\pm$ 21.5      | 6.9 $\pm$ 20.4       | 0.041* |
| $\Delta$ Cholesterol%*                              | 0.9 $\pm$ 21.1        | -1.2 $\pm$ 22.0      | 4.9 $\pm$ 19.3       | 0.366  |
| $\Delta$ Triglyceride%*                             | -3.1 $\pm$ 41.6       | 2.8 $\pm$ 43.3       | -14.4 $\pm$ 36.7     | 0.198  |
| $\Delta$ CRP%*                                      | 609.5 $\pm$ 30.6      | 955.1 $\pm$ 454.9    | -58.6 $\pm$ 7.9      | 0.034* |
| <b>DXA-related measurements</b>                     |                       |                      |                      |        |
| Before CCRT                                         |                       |                      |                      |        |
| LBM (kg)                                            | 43.8 $\pm$ 5.9        | 43.8 $\pm$ 5.6       | 43.9 $\pm$ 6.6       | 0.925  |
| TFM (kg)                                            | 17.5 $\pm$ 7.3        | 17.5 $\pm$ 7.0       | 17.7 $\pm$ 8.2       | 0.914  |
| ASM (kg)                                            | 18.5 $\pm$ 3.3        | 18.6 $\pm$ 3.1       | 18.5 $\pm$ 3.9       | 0.969  |
| Treatment-interval change (%)                       |                       |                      |                      |        |
| $\Delta$ LBM%*                                      | -7.1 $\pm$ 6.0        | -9.2 $\pm$ 5.1       | -3.6 $\pm$ 1.1       | 0.001* |
| $\Delta$ TFM%*                                      | -3.4 $\pm$ 13.2       | -3.4 $\pm$ 20.2      | -3.1 $\pm$ 18.1      | 0.908  |
| $\Delta$ ASM%*                                      | -7.8 $\pm$ 8.5        | -10.8 $\pm$ 8.0      | -2.0 $\pm$ 6.4       | 0.027* |
| <b>HLOP Metabolites</b>                             |                       |                      |                      |        |
| Before CCRT                                         |                       |                      |                      |        |
| Histidine (μM)                                      | 78.8 $\pm$ 16.2       | 78.9 $\pm$ 15.4      | 78.4 $\pm$ 18.3      | 0.917  |
| Leucine (μM)                                        | 128.7 $\pm$ 40.2      | 120.4 $\pm$ 36.5     | 144.9 $\pm$ 43.1     | 0.054  |

|                                                 |                       |                       |                      |        |
|-------------------------------------------------|-----------------------|-----------------------|----------------------|--------|
| Ornithine (μM)                                  | 122.5 ± 35.4          | 122.3 ± 39.2          | 122.6 ± 27.8         | 0.983  |
| Phenylalanine (μM)                              | 63.1 ± 10.4           | 63.6 ± 16.4           | 65.5 ± 17.1          | 0.705  |
| Treatment-interval change (%)                   |                       |                       |                      |        |
| ΔHistidine%*                                    | -1.4 ± 28.2           | -6.2 ± 15.3           | 7.6 ± 11.5           | 0.038* |
| ΔLeucine%*                                      | -7.5 ± 27.2           | -3.5 ± 24.0           | -15.3 ± 23.4         | 0.076  |
| ΔOrnithine%*                                    | -7.0 ± 23.4           | -11.7 ± 27.6          | -12.1 ± 22.9         | 0.963  |
| ΔPhenylalanine%*                                | 13.9 ± 33.3           | 8.6 ± 28.4            | 5.9 ± 33.0           | 0.785  |
| Mean daily calorie intake during CCRT †         | 26.9 ± 6.6            | 27.2 ± 7.1            | 26.5 ± 5.7           | 0.738  |
| ≥ 25 and < 30 : ≥ 30                            | 31 (70.5) : 13 (29.5) | 19 (65.5) : 10 (34.5) | 12 (80.0) : 3 (20.0) | 0.318  |
| Mean daily protein intake during CCRT††         | 1.0 ± 0.3             | 1.0 ± 0.2             | 1.0 ± 0.3            | 0.751  |
| Mean daily CHO intake during CCRT††             | 3.7 ± 0.9             | 3.7 ± 0.7             | 3.7 ± 0.9            | 0.738  |
| Mean daily fat intake during CCRT††             | 0.8 ± 0.2             | 0.9 ± 0.2             | 0.8 ± 0.2            | 0.739  |
| Feeding tube placement (no vs. yes)             | 22 (50.0) : 22 (50.0) | 16 (55.2) : 13 (44.8) | 6 (40.0) : 9 (60.0)  | 0.340  |
| Mean days of feeding tube placement during CCRT | 20.3 ± 3.7            | 19.6 ± 4.7            | 21.7 ± 5.8           | 0.792  |
| <b>CCRT data</b>                                |                       |                       |                      |        |
| Radiotherapy                                    |                       |                       |                      |        |
| Dose (Gy)                                       | 66.6 ± 3.9            | 65.9 ± 3.9            | 67.7 ± 4.0           | 0.154  |
| Fractions                                       | 32.6 ± 1.3            | 32.3 ± 1.3            | 32.9 ± 1.2           | 0.146  |
| Duration (days)                                 | 48.4 ± 5.1            | 48.6 ± 5.8            | 47.8 ± 3.5           | 0.648  |
| Cisplatin dose (mg/m <sup>2</sup> )             | 233.4 ± 22.2          | 238.1 ± 14.6          | 215.0 ± 35.7         | 0.004* |
| Grade 3/4 toxicity during CCRT                  |                       |                       |                      |        |
| Non-hematologic                                 |                       |                       |                      |        |
| Dermatitis (no vs. yes)                         | 43 (97.7) : 1 (2.3)   | 28 (96.6) : 1 (3.4)   | 15 (100) : 0 (0.0)   | 0.608  |
| Pharyngitis (no vs. yes)                        | 42 (95.5) : 2 (4.5)   | 27 (93.1) : 2 (6.9)   | 15 (100) : 0 (0.0)   | 0.298  |
| Infection (no vs. yes)                          | 30 (68.2) : 14 (31.8) | 20 (69.0) : 9 (31.0)  | 10 (66.7) : 5 (33.3) | 0.877  |
| Mucositis (no vs. yes)                          | 33 (75.0) : 11 (25.0) | 19 (65.5) : 10 (34.5) | 14 (93.3) : 1 (6.7)  | 0.043* |
| Emesis (no vs. yes)                             | 41 (93.2) : 3 (6.8)   | 27 (93.1) : 2 (6.9)   | 14 (93.3) : 1 (6.7)  | 0.977  |
| Hematologic                                     |                       |                       |                      |        |
| Anemia (no vs. yes)                             | 41 (93.2) : 3 (6.8)   | 27 (93.1) : 2 (6.9)   | 14 (93.3) : 1 (6.7)  | 0.977  |
| Neutropenia (no vs. yes)                        | 29 (65.9) : 15 (34.1) | 20 (69.0) : 9 (31.0)  | 9 (60.0) : 6 (40.0)  | 0.552  |
| Thrombocytopenia (no vs. yes)                   | 38 (86.4) : 6 (13.6)  | 25 (86.2) : 4 (13.8)  | 13 (86.7) : 2 (13.3) | 0.801  |
| Number of grade 3/4 toxicity                    | 1.2 ± 1.1             | 1.4 ± 1.2             | 1.0 ± 1.0            | 0.338  |

†unit: Kcal /kg/day ††unit: g/kg/day

\* Comparing the value difference between treatment interruption and treatment with no interruption for each variable;  $p < 0.05$ , statistically significant

§ ΔCRP increase was defined as a positive value obtained by subtracting the pre-treatment CRP value from the post-treatment CRP value. ΔCRP decrease was defined as a negative value obtained by subtracting the pre-treatment CRP value from the post-treatment CRP value.

The Mann–Whitney test was used for ΔHb%, CRP, Δ uric acid%, total bilirubin, mean days for feeding tube placement, dose, fraction and days of radiotherapy, cisplatin dose, all DXA-related measurements, all metabolites, and the number of grade 3/4 toxicities. Independent  $t$  test was used for other continuous variables. The chi-square test was used for all categorical data.

\*Δ indicates the value obtained by subtracting the pretreatment value from the post-treatment value; % indicates

$(\Delta \text{ value} / \text{the pretreatment value}) \times 100\%$

Abbreviations: LAHNSCC, locally advanced head and neck squamous cell carcinoma; CCRT, concurrent chemoradiotherapy; SD, standard deviation; HN-CCI, Charlson comorbidity index; ECOG, Eastern Cooperative Oncology Group; CHO, carbohydrate; PG-SGA, patient-generated subjective global assessment; BW, body weight; BMI, body mass index; eGFR, estimated glomerular filtration rate; ALT, alanine aminotransferase; Hb, hemoglobin; WBC, white blood cell; TLC, total lymphocyte count; TNC, total neutrophil count; TMC, total monocyte count; CRP, C-reactive protein; DXA, dual-energy X-ray absorptiometry; LBM, lean body mass; TFM, total fat mass; ASM, appendicular skeletal mass; HLOP, histidine, leucine, ornithine, and phenylalanine.

Table S2. Associations of clinicopathologic variables, NIBs, body composition parameters, treatment-related factors, and serum metabolites with treatment interval changes of leucine and ornithine over the CCRT course in 44 patients with LAHNSCC completing CCRT

| Variables                                                     | ΔLeucine%        |                      | ΔOrnithine%      |                  |                      |                  |
|---------------------------------------------------------------|------------------|----------------------|------------------|------------------|----------------------|------------------|
|                                                               | Univariate       | Multivariate         |                  | Univariate       | Multivariate         |                  |
|                                                               | <i>p</i> -value* | Coefficient (95% CI) | <i>p</i> -value* | <i>p</i> -value* | Coefficient (95% CI) | <i>p</i> -value* |
| <i>Clinicopathologic factors</i>                              |                  |                      |                  |                  |                      |                  |
| Age                                                           | 0.779            |                      |                  | 0.965            |                      |                  |
| Sex (male <i>vs</i> female)                                   | 0.803            |                      |                  | 0.803            |                      |                  |
| Tumor location (OC <i>vs</i> NOC)                             | 0.859            |                      |                  | 0.281            |                      |                  |
| TNM stage (III <i>vs</i> IVA <i>vs</i> IVB)                   | 0.602            |                      |                  | 0.068            |                      |                  |
| T status (T1-2 <i>vs</i> T3-4)                                | 0.007*           |                      |                  | 0.376            |                      |                  |
| N status (N0-1 <i>vs</i> N2-3)                                | 0.732            |                      |                  | 0.892            |                      |                  |
| Histologic grade (well <i>vs</i> moderately <i>vs</i> poorly) | 1.00             |                      |                  | 1.00             |                      |                  |
| Smoking (no <i>vs</i> yes)                                    | 0.550            |                      |                  | 0.032*           |                      |                  |
| Alcohol (no <i>vs</i> yes)                                    | 0.067            |                      |                  | 0.271            |                      |                  |
| Betel nut (no <i>vs</i> yes)                                  | 0.884            |                      |                  | 0.079            |                      |                  |
| ECOG performance status (0 : 1 : 2)                           | 0.163            |                      |                  | 0.547            |                      |                  |
| Tracheostomy (no <i>vs</i> yes)                               | 0.206            |                      |                  | 0.138            |                      |                  |
| PG-SGA before CCRT (none : moderate : severe)                 | 0.385            |                      |                  | 0.247            |                      |                  |
| <i>Biochemical data</i>                                       |                  |                      |                  |                  |                      |                  |
| <b>Before CCRT</b>                                            |                  |                      |                  |                  |                      |                  |
| eGFR (mL/min/1.73 m²)                                         | 0.930            |                      |                  | 0.840            |                      |                  |
| ALT (U/L)                                                     | 0.069            |                      |                  | 0.953            |                      |                  |
| Total bilirubin (mg/dL)                                       | 0.437            |                      |                  | 0.931            |                      |                  |
| Uric acid (mg/dL)                                             | 0.756            |                      |                  | 0.182            |                      |                  |
| Sugar (AC)( mg/dL)                                            | 0.810            |                      |                  | 0.112            |                      |                  |
| <b>Treatment-interval change (%)</b>                          |                  |                      |                  |                  |                      |                  |
| ΔeGFR%‡                                                       | 0.640            |                      |                  | 0.237            |                      |                  |
| ΔALT%‡                                                        | 0.114            |                      |                  | 0.261            |                      |                  |
| ΔTotal bilirubin%‡                                            | 0.066            |                      |                  | 0.334            |                      |                  |
| ΔUric acid%‡                                                  | 0.573            |                      |                  | 0.495            |                      |                  |

|                                                     |        |                         |                       |        |
|-----------------------------------------------------|--------|-------------------------|-----------------------|--------|
| ΔSugar (AC)*                                        | 0.745  |                         |                       | 0.783  |
| <i>Anthropometric data and blood NIBs data</i>      |        |                         |                       |        |
| <b>Before CCRT</b>                                  |        |                         |                       |        |
| BW (kg)                                             | 0.441  |                         |                       | 0.850  |
| BMI (kg/m <sup>2</sup> )                            | 0.466  |                         |                       | 0.905  |
| Hb (g/dL)                                           | 0.016* |                         |                       | 0.189  |
| WBC (x10 <sup>3</sup> cells/mm <sup>3</sup> )       | 0.025* |                         |                       | 0.176  |
| Platelet count (x10 <sup>3</sup> /mm <sup>3</sup> ) | 0.194  |                         |                       | 0.794  |
| TLC (x10 <sup>3</sup> cells/mm <sup>3</sup> )       | 0.036* | 13.108 (6.210 ~ 19.990) | <0.001*               | 0.409  |
| TNC (x 10 <sup>3</sup> /mm <sup>3</sup> )           | 0.086  |                         |                       | 0.151  |
| TMC (x 10 <sup>3</sup> /mm <sup>3</sup> )           | 0.032* |                         |                       | 0.368  |
| Albumin (g/dL)                                      | 0.113  |                         |                       | 0.720  |
| Prealbumin (g/dL)                                   | 0.072  |                         |                       | 0.425  |
| Transferrin (g/dL)                                  | 0.311  |                         |                       | 0.199  |
| Total cholesterol (mg/dL)                           | 0.313  |                         |                       | 0.363  |
| Triglyceride (mg/dL)                                | 0.475  |                         |                       | 0.892  |
| CRP (mg/dL)                                         | 0.486  |                         |                       | 0.498  |
| <b>Treatment-interval change (%)</b>                |        |                         |                       |        |
| ΔBW%*                                               | 0.747  |                         |                       | 0.597  |
| ΔBMI%*                                              | 0.387  |                         |                       | 0.510  |
| ΔHb%*                                               | 0.002* | 0.470 (0.127 ~ 0.816)   | 0.009*                | 0.032* |
| ΔWBC%*                                              | 0.630  |                         |                       | 0.185  |
| ΔPlatelet%*                                         | 0.092  |                         |                       | 0.756  |
| ΔTLC%*                                              | 0.179  |                         |                       | 0.414  |
| ΔTNC%*                                              | 0.307  |                         |                       | 0.876  |
| ΔTMC%*                                              | 0.508  |                         |                       | 0.923  |
| ΔAlbumin%*                                          | 0.305  |                         |                       | 0.146  |
| ΔPrealbumin%*                                       | 0.769  |                         |                       | 0.162  |
| ΔTransferrin%*                                      | 0.658  |                         |                       | 0.103  |
| ΔCholesterol%*                                      | 0.021  |                         |                       | 0.003  |
|                                                     |        |                         | 0.430 (0.054 ~ 0.807) | 0.026* |
| ΔTriglyceride%*                                     | 0.343  |                         |                       | 0.821  |

|                                                        |         |                          |         |        |
|--------------------------------------------------------|---------|--------------------------|---------|--------|
| $\Delta$ CRP%*                                         | 0.951   |                          |         | 0.053  |
| <i><b>DXA-related measurements</b></i>                 |         |                          |         |        |
| <b>Before CCRT</b>                                     |         |                          |         |        |
| LBM (kg)                                               | 0.694   |                          |         | 0.664  |
| TFM (kg)                                               | 0.385   |                          |         | 0.990  |
| ASM (kg)                                               | 0.920   |                          |         | 0.917  |
| <b>Treatment-interval change (%)</b>                   |         |                          |         |        |
| $\Delta$ LBM%*                                         | 0.388   |                          |         | 0.633  |
| $\Delta$ TFM%*                                         | 0.326   |                          |         | 0.105  |
| $\Delta$ ASM%*                                         | 0.849   |                          |         | 0.915  |
| <i><b>HLOP Metabolites</b></i>                         |         |                          |         |        |
| <b>Before CCRT</b>                                     |         |                          |         |        |
| Histidine ( $\mu$ M)                                   | <0.001* |                          |         | 0.052  |
| Leucine ( $\mu$ M)                                     | <0.001* | -0.462 (-0.536 ~ -0.309) | <0.001* | 0.545  |
| Ornithine ( $\mu$ M)                                   | 0.001*  |                          |         | 0.005* |
| Phenylalanine ( $\mu$ M)                               | <0.001* |                          |         | 0.303  |
| <b>Treatment-interval change (%)</b>                   |         |                          |         |        |
| $\Delta$ Histidine%*                                   | 0.015*  |                          |         | 0.022* |
| $\Delta$ Leucine%*                                     | ----    |                          |         | 0.004* |
| $\Delta$ Ornithine%*                                   | 0.004*  | 0.265 (0.082 ~ 0.448)    | 0.006*  | ----   |
| $\Delta$ Phenylalanine%*                               | 0.001*  |                          |         | 0.102  |
| <i>Mean daily calorie intake during CCRT †</i>         | 0.764   |                          |         | 0.697  |
| <i>Mean daily protein intake during CCRT††</i>         | 0.723   |                          |         | 0.409  |
| <i>Mean daily CHO intake during CCRT††</i>             | 0.864   |                          |         | 0.029  |
| <i>Mean daily fat intake during CCRT††</i>             | 0.959   |                          |         | 0.686  |
| <i>Feeding tube placement (no vs. yes)</i>             | 0.583   |                          |         |        |
| <i>Mean days of feeding tube placement during CCRT</i> | 0.750   |                          |         | 0.083  |
| <i><b>CCRT factor</b></i>                              |         |                          |         |        |
| RT dose (Gy)                                           | 0.710   |                          |         | 0.647  |
| RT fractions                                           | 0.296   |                          |         | 0.851  |
| RT duration (days)                                     | 0.439   |                          |         | 0.709  |

|                                        |        |       |
|----------------------------------------|--------|-------|
| Cisplatin dose (mg/m <sup>2</sup> )    | 0.153  | 0.119 |
| <b>CCRT-induced grade 3/4 toxicity</b> |        |       |
| <b>Non-hematologic</b>                 |        |       |
| Dermatitis (no <i>vs</i> yes)          | 0.318  | 0.091 |
| Pharyngitis (no <i>vs</i> yes)         | 0.013* | 0.211 |
| Mucositis (no <i>vs</i> yes)           | 0.979  | 0.391 |
| Infection (no <i>vs</i> yes)           | 0.880  | 0.705 |
| Emesis (no <i>vs</i> yes)              | 0.563  | 0.596 |
| <b>Hematologic</b>                     |        |       |
| Anemia (no <i>vs</i> yes)              | 0.221  | 0.394 |
| Neutropenia (no <i>vs</i> yes)         | 0.594  | 0.450 |
| Thrombocytopenia (no <i>vs</i> yes)    | 0.777  | 0.777 |

\*indicates a significant *p*-value < 0.05.

Univariate analysis: simple linear regression model for all continuous variables; Mann–Whitney test for sex, T status, N status, smoking, alcohol, betel nut, tracheostomy, and feeding tube placement; Kruskal–Wallis test for TNM stage, histological grade, ECOG performance status, and PG-SGA

\*Δ indicates the value obtained by subtracting the pretreatment value from the post-treatment value; % indicates (Δ value/ the pretreatment value) x100%

Abbreviations: NIBs, nutritional and inflammatory biomarkers; LAHNSCC, locally advanced head and neck squamous cell carcinoma; CCRT, concurrent chemoradiotherapy; CI, confidence interval; OC, oral cavity; NOC, non-oral cavity; TNM, tumor node metastasis; ECOG, Eastern Collaboration Oncology Group; RT, radiotherapy; PG-SGA, patient-generated subjective global assessment; eGFR, estimated glomerular filtration rate; ALT, alanine transaminase; NIBs, nutritional/inflammatory biomarkers; BMI, body mass index; BW, body weight; Hb, hemoglobin; WBC, white cell count; TLC, total lymphocyte count; TNC, total neutrophil count; TMC, total monocyte count; CRP, C-reactive protein; DXA, dual-energy X-ray absorptiometry; LBM, lean body mass; TFM, total fat mass; ASM, appendicular skeletal mass; HLOP, histidine, leucine, ornithine, and phenylalanine.



Table S3. Clinicopathologic variables, biochemical and nutrition-inflammation data, anthropometric and body composition characteristics, and serum HLOP metabolite of 50 patients with LAHNSCC stratified by the status of complete and incomplete CCRT

| Variables expressed as Numbers (%) or mean $\pm$ SD  | Complete CCRT                  | Incomplete CCRT <sup>s</sup>  | <i>p</i> value* |
|------------------------------------------------------|--------------------------------|-------------------------------|-----------------|
| Included patient number                              | 44 (88.0)                      | 6 (12.0)                      |                 |
| <b><i>Clinicopathologic</i></b>                      |                                |                               |                 |
| Age (years)                                          | 54.7 $\pm$ 9.1                 | 56.5 $\pm$ 7.4                | 0.645           |
| Sex (male: female)                                   | 42 (95.5) : 2 (4.5)            | 6 (100.0) : 0 (0.0)           | 0.594           |
| Tumor location (oral cavity/non-oral cavity)         |                                |                               | 0.133           |
| Buccal mucosa/Tonsil                                 | 3 (6.8) / 3 (6.8)              | 1 (16.7) / 1 (16.7)           |                 |
| Tongue/Tongue base                                   | 12 (27.2) / 1 (2.2)            | 1 (16.7) / 0 (0.0)            |                 |
| Gingiva/Soft palate                                  | 5 (11.4) / 0 (0.0)             | 1 (16.7) / 0 (0.0)            |                 |
| Retromolar /Hypopharynx                              | 2 (4.5) / 10 (22.7)            | 0 (0.0) / 1 (16.7)            |                 |
| Hard palate / Larynx                                 | 1 (2.2) / 5 (6.7)              | 0 (0.0) / 1 (16.7)            |                 |
| Lip/--                                               | 2 (4.5) / --                   | 0 (0.0)/ ---                  |                 |
| TNM stage                                            |                                |                               | 0.149           |
| III : IVA : IVB                                      | 4 (9.1):22 (50.0) : 18 (40.9)  | 0 (0.0) : 1 (16.7) : 5 (83.3) |                 |
| T status                                             |                                |                               | 0.849           |
| T0-2 : T3-4                                          | 13 (29.5) : 31 (70.5)          | 2 (33.3) : 4 (66.7)           |                 |
| N status                                             |                                |                               | 0.941           |
| N0-1 : N2-3                                          | 14 (31.8) : 30 (68.2)          | 2 (33.3) : 4 (66.7)           |                 |
| Histological differentiation grade                   |                                |                               |                 |
| well : moderately : poorly                           | 5 (11.4): 32 (72.7) : 7 (15.9) | 1 (16.7) : 5 (83.3) : 0 (0.0) | 0.583           |
| ECOG performance status (0 : 1 : 2)                  | 3 (6.8) : 39 (88.6) : 2 (4.5)  | 2 (33.3) : 4 (66.7) : 0 (0.0) | 0.358           |
| Tracheostomy (no vs. yes)                            | 27 (61.4) : 17 (38.6)          | 3 (50.0) : 3 (50.0)           | 0.594           |
| Smoking exposure (no vs. yes)                        | 7 (15.8) : 37 (84.1)           | 1 (16.7) : 5 (83.3)           | 0.962           |
| Alcohol consumption (no vs. yes)                     | 12 (27.3) : 32 (72.7)          | 2 (33.3) : 4 (66.7)           | 0.756           |
| Betel nut use (no vs. yes)                           | 11 (37.9) : 18 (62.1)          | 3 (50.0) : 3 (50.0)           | 0.519           |
| HN-CCI (0 : $\geq$ 1)                                | 18 (40.9) : 26 (59.1)          | 2 (33.3) : 4 (66.7)           | 0.722           |
| <b>PG-SGA assessment before CCRT</b>                 |                                |                               |                 |
| Malnutrition none : moderate : severe                | 9 (20.5): 26 (59.0) : 9 (20.5) | 0 (20.0): 4 (66.7) : 2 (33.3) | 0.433           |
| <b><i>Biochemical data</i></b>                       |                                |                               |                 |
| eGFR (mL/min/1.73 m <sup>2</sup> )                   | 104.2 $\pm$ 32.2               | 105.0 $\pm$ 29.5              | 0.910           |
| ALT (U/L, normal $\leq$ 36)                          | 24.6 $\pm$ 14.7                | 33.7 $\pm$ 21.2               | 0.188           |
| Total bilirubin (mg/dL, normal $\leq$ 1.3)           | 0.7 $\pm$ 0.4                  | 0.9 $\pm$ 1.0                 | 0.502           |
| Uric acid (mg/dL, normal < 7.0)                      | 5.2 $\pm$ 1.8                  | 5.1 $\pm$ 1.3                 | 0.948           |
| Sugar (AC, mg/dL)                                    | 115.2 $\pm$ 48.2               | 110.0 $\pm$ 34.2              | 0.799           |
| <b><i>Anthropometric data and blood NIB data</i></b> |                                |                               |                 |
| BW (kg)                                              | 63.9 $\pm$ 12.3                | 64.6 $\pm$ 7.2                | 0.900           |
| BMI (kg/m <sup>2</sup> )                             | 23.0 $\pm$ 3.9                 | 21.9 $\pm$ 2.6                | 0.517           |
| Hb (g/dL)                                            | 12.0 $\pm$ 1.7                 | 11.6 $\pm$ 2.4                | 0.637           |
| WBC (x10 <sup>3</sup> cells/mm <sup>3</sup> )        | 6.6 $\pm$ 2.8                  | 6.6 $\pm$ 1.9                 | 0.975           |
| Platelet count (x10 <sup>3</sup> /mm <sup>3</sup> )  | 260.1 $\pm$ 91.4               | 270.3 $\pm$ 71.0              | 0.794           |
| TLC (x10 <sup>3</sup> cells/mm <sup>3</sup> )        | 1.8 $\pm$ 0.6                  | 1.6 $\pm$ 0.3                 | 0.480           |
| TNC (x 10 <sup>3</sup> /mm <sup>3</sup> )            | 4.0 $\pm$ 2.0                  | 4.2 $\pm$ 1.9                 | 0.855           |
| TMC (x 10 <sup>3</sup> /mm <sup>3</sup> )            | 0.5 $\pm$ 0.1                  | 0.4 $\pm$ 0.2                 | 0.329           |
| Albumin (g/dL)                                       | 3.9 $\pm$ 0.4                  | 3.8 $\pm$ 0.8                 | 0.576           |
| Prealbumin (g/dL, normal: 20–40)                     | 25.3 $\pm$ 5.4                 | 23.5 $\pm$ 6.6                | 0.249           |
| Transferrin (g/dL normal: 200–360)                   | 208.0 $\pm$ 34.6               | 196.2 $\pm$ 412.1             | 0.747           |

|                                         |              |               |       |
|-----------------------------------------|--------------|---------------|-------|
| Total cholesterol (mg/dL, normal < 200) | 169.3 ± 41.8 | 175.7 ± 54.2  | 0.736 |
| Triglyceride (mg/dL, normal < 150)      | 152.5 ± 17.2 | 175.8 ± 116.3 | 0.483 |
| CRP (mg/dL)                             | 6.3 ± 7.7    | 10.4 ± 13.3   | 0.267 |
| <b><i>DXA-related measurements</i></b>  |              |               |       |
| LBM (kg)                                | 43.8 ± 5.9   | 46.7 ± 2.4    | 0.294 |
| TFM (kg)                                | 17.5 ± 7.3   | 15.6 ± 5.8    | 0.576 |
| ASM (kg)                                | 18.2 ± 3.7   | 18.4 ± 3.2    | 0.911 |
| <b><i>HLOP Metabolites</i></b>          |              |               |       |
| Histidine (μM)                          | 78.8 ± 16.2  | 76.7 ± 17.4   | 0.770 |
| Leucine (μM)                            | 128.7 ± 40.2 | 120.7 ± 29.5  | 0.641 |
| Ornithine (μM)                          | 122.4 ± 35.4 | 118.6 ± 26.4  | 0.802 |
| Phenylalanine (μM)                      | 64.3 ± 16.5  | 61.4 ± 17.3   | 0.698 |

\* Comparison of the value difference between complete CCRT and incomplete CCRT for each variable;  $p < 0.05$ , statistical significance.

§Incomplete CCRT group included drop-outs and incomplete data collection.

The Mann–Whitney test was used for CRP, total bilirubin, all DXA-related measurements, and all metabolites. Independent  $t$  test was used for other continuous variables. The chi-square test was used for all categorical data. Abbreviations: LAHNSCC, locally advanced head and neck squamous cell carcinoma; CCRT, concurrent chemoradiotherapy; SD, standard deviation; HN-CCI, Charlson comorbidity index; ECOG, Eastern Cooperative Oncology Group; PG-SGA, patient-generated subjective global assessment; BW, body weight; BMI, body mass index; eGFR, estimated glomerular filtration rate; ALT, alanine aminotransferase; Hb, hemoglobin; WBC, white blood cell; TLC, total lymphocyte count; TNC, total neutrophil count; TMC, total monocyte count; CRP, C-reactive protein; DXA, dual-energy X-ray absorptiometry; LBM, lean body mass; TFM, total fat mass; ASM, appendicular skeletal mass; HLOP, histidine, leucine, ornithine, phenylalanine.
